# Supplementary material for: Oral Pathological Features in Methamphetamine Users in Eastern China
Source: Research Square preprint supplement (doi:10.21203/rs.3.rs-7575241/v1), 2026-01-12
Supplement: Supplementary file 1 [file 8ff7463bc8e67c1a78632056.docx]

**Oral Health Questionnaire**

**ID:** ___________
**Name:** ___________
**Age:** ___________
**Gender:** ___________
**Ethnicity:** ___________
**Date:** _______ / _______ / 2025

Dear Participant,
Thank you for taking part in this survey. This study aims to assess the oral health status of individuals undergoing drug rehabilitation. After completing the questionnaire, a professional dentist will perform an oral examination and provide advice on any oral health issues identified.
We assure you that your personal information will be kept strictly confidential in accordance with relevant laws and regulations, and will not be disclosed, sold, or used for commercial or other improper purposes.

Please answer truthfully. For multiple-choice questions, mark “√” in the box □ before your choice.

### 1. Which types of drugs have you used? (Check all that apply)

□ Methamphetamine
□ Heroin
□ Etomidate
□ Cocaine
□ Ketamine
□ Other: ___________

### 2. What is your usual route of drug administration? (Check all that apply)

□ Oral ingestion
□ Nasal inhalation/snorting
□ Intravenous injection
□ Arterial injection
□ Smoking
□ Other: ___________

### 3. How long did you use drugs in the past? (e.g., 1 year 2 months)

### 4. How long have you been abstinent? (e.g., 1 year 2 months)

### 5. Do you have any chronic diseases? (Check all that apply)

□ None
□ Hypertension
□ Diabetes
□ Hyperlipidemia
□ Heart disease
□ Osteoporosis
□ Other: ___________

### 6. How many times do you brush your teeth per day?

□ Do not brush
□ Once
□ Twice
□ Three or more times

### 7. When do you brush your teeth?

□ Never
□ Before meals
□ After meals
□ Both before and after meals
□ Other: ___________

### 8. How long do you brush each time?

□ Less than 1 minute
□ 1–2 minutes
□ More than 2 minutes

### 9. In the past year, did your gums bleed when brushing?

□ No
□ Occasionally
□ Often

### 10. Do you rinse your mouth after meals?

□ No
□ Occasionally
□ After every meal

### 11. Do you use toothpicks or dental floss?

□ No
□ Occasionally
□ Weekly
□ Daily

### 12. How often do you consume the following foods or drinks? (Select one per row)

| **Item** | **≥2 times/day** | **Once/day** | **4–6 times/week** | **1–3 times/week** | **1–3 times/month** | **Rarely** | **Never** |
| --- | --- | --- | --- | --- | --- | --- | --- |
| 1. Sweet pastries (cookies, cakes, bread) | □ | □ | □ | □ | □ | □ | □ |
| 2. Candies (lollipops, chocolate, gummies) | □ | □ | □ | □ | □ | □ | □ |
| 3. Sweet drinks (juices, lemonade, other non-fresh juices) | □ | □ | □ | □ | □ | □ | □ |
| 4. Carbonated drinks (cola, Sprite, etc.) | □ | □ | □ | □ | □ | □ | □ |
| 5. Sweetened milk, yogurt, milk powder, tea, soy milk, coffee, milk tea | □ | □ | □ | □ | □ | □ | □ |

### 13. Do you often get food stuck between your teeth after eating?

□ No
□ Occasionally
□ Often
(If often, indicate location: □ Upper left □ Lower left □ Upper right □ Lower right)

### 14. In the past year, have you often felt your mouth was dry?

□ No
□ Yes → If yes, answer Q15; if no, skip to Q16

### 15. After quitting drugs, has your dry mouth improved?

□ No improvement
□ Improved
□ Not sure

### 16. Do you grind your teeth (e.g., at night) or clench your jaw?

□ No
□ Occasionally
□ Often
□ Not sure

### 17. Do you smoke?

□ No
□ Yes → If yes, answer Q18; if no, skip to Q19

### 18. How many cigarettes do you smoke per day?

□ Fewer than 5
□ 5–9
□ 10–19
□ 1 pack
□ 2 or more packs

### 19. How is your sleep quality?

□ Never have insomnia
□ Occasionally have insomnia
□ Often have insomnia

### 20. Have you ever visited a dentist?

□ Yes
□ No

### 21. How would you rate your oral health status?

□ Excellent
□ Good
□ Fair
□ Poor
□ Very poor
